# Supplementary material for: Hydroformylation of alkenes in supercritical carbon dioxide catalysed by rhodium trialkylphosphine complexes
Source: Royal Society of Chemistry journal article supplement (doi:10.1039/b207747g), 2002-01-01
Supplement: b207747g.doc [file b207747g.doc]

Full Analysis of products obtained from the hydroformylation of 1-hexene in scCO2 catalysed by [Rh2(OAc)4]/PEt3 in scCO2 on changing the rhodium (and phosphine) concentrationa

| [Rh / mol dm-3 | Conversion / % | Heptanal / % | 2-methylhexanal / % | l:b | C7 Alcohols / % | Isomerised hexenes / % |
| --- | --- | --- | --- | --- | --- | --- |
| 0.14 | 93.2 | 62.4 | 26.6 | 2.34 | 2.1 | 2.1 |
| 0.13 | 89.7 | 61.1 | 26.8 | 2.28 | 0 | 1.7 |
| 0.05 | 72.6 | 49.8 | 21.1 | 2.35 | 0 | 1.6 |
| 0.045 | 72.6 | 48.4 | 20.5 | 2.36 | 1 | 2.6 |
| 0.045 | 85.5 | 58.5 | 23.4 | 2.5 | 1 | 2.5 |
| 0.0204 | 77.7 | 47.6 | 18.3 | 2.6 | 0 | 11.7 |
| 0.018 | 64.4 | 29.8 | 11.2 | 2.65 | 0 | 24.4 |

a 1-hexene (1 cm3, 7.8 mmol) catalysed by Rh/PEt3 (1:3) complexes in scCO2. 100 oC, 230 bar, CO/H2 (1:1, .40 bar at 25 oC), 1 h, autoclave volume = 36 cm3.
